# Supplementary material
Source: MDPI journal article supplement (https://www.mdpi.com/2227-9040/10/10/380)
Supplement: s1 [file s1]

# Simultaneous Analysis of MLH1, MSH2, MSH6, PMS2 and KRAS in Patients with Gastric and Colon Cancer Using Stochastic Sensors

Damaris-Cristina Gheorghe <sup>1,2,\*</sup>, Raluca-Ioana Stefan-van Staden <sup>1,2,\*</sup>, Florina Pogacean <sup>3</sup> and Stela Pruneanu <sup>3</sup>

<sup>1</sup> Laboratory of Electrochemistry and PATLAB, National Institute of Research for Electrochemistry

and Condensed Matter, 202 Splaiul Independentei Street, 060021 Bucharest-6, Romania

<sup>2</sup> Faculty of Chemical Engineering and Biotechnologies, Politehnica University of Bucharest, 1-7 Gheorghe Polizu Street, 011061 Bucharest, Romania

<sup>3</sup> National Institute for Research and Development of Isotopic and Molecular Technologies, 67-103 Donat Street, 400293 Cluj-Napoca, Romania; florina.pogacean@itim-cj.ro (F.P.); stela.pruneanu@itim-cj.ro (S.P.)

\* Correspondence: gheorghe.damaris16@gmail.com (D.-C.G.); ralucaivanstaden@gmail.com (R.-I.S.-v.S.)

Table S1. Determination of MLH1, MSH2, MSH6, PMS2 and KRAS in tissue samples (N=10).

| Sample No. | Sensor     | MLH1 ng mL <sup>-1</sup> | MSH2 pg mL <sup>-1</sup> | MSH6 pg mL <sup>-1</sup> | PMS2 ng mL <sup>-1</sup> | KRAS µg mL <sup>-1</sup> |
|------------|------------|--------------------------|--------------------------|--------------------------|--------------------------|--------------------------|
| 1          | MD/SPEXF84 | 27.53±0.02               | 727.44±0.03              | 24.10±0.02               | 1.20±0.03                | 1.10±0.01                |
|            | MD/SPEXF88 | 26.94±0.03               | 730.32±0.04              | 24.24±0.03               | 1.21±0.02                | 1.09±0.02                |
| 2          | MD/SPEXF84 | 101.70±0.02              | 516.89±0.02              | 17.77±0.02               | 61.20±0.03               | 11.36±0.04               |
|            | MD/SPEXF88 | 99.47±0.03               | 517.03±0.03              | 17.31±0.04               | 61.21±0.02               | 11.25±0.02               |
| 3          | MD/SPEXF84 | 61.98±0.02               | 369.89±0.01              | 50.01±0.04               | 105.35±0.02              | 4.39±0.03                |
|            | MD/SPEXF88 | 62.00±0.03               | 368.87±0.02              | 49.08±0.02               | 106.00±0.03              | 4.21±0.02                |
| 4          | MD/SPEXF84 | 101.70±0.03              | 13.98±0.01               | 97.53±0.03               | 3.47±0.03                | 22.28±0.02               |
|            | MD/SPEXF88 | 100.96±0.02              | 13.99±0.03               | 98.82±0.02               | 3.52±0.01                | 22.32±0.03               |
| 5          | MD/SPEXF84 | 47.74±0.03               | 727.48±0.04              | 18.67±0.02               | 2.20±0.02                | 2.90±0.01                |

# Supplementary Material

|    |            |            |              |             |             |            |
|----|------------|------------|--------------|-------------|-------------|------------|
|    | MD/SPEXF88 | 48.32±0.02 | 729.60±0.03  | 18.27±0.03  | 2.35±0.02   | 2.50±0.03  |
| 6  | MD/SPEXF84 | 14.39±0.02 | 180.95±0.03  | 21.20±0.03  | 814.00±0.04 | 7.73±0.02  |
|    | MD/SPEXF88 | 14.00±0.06 | 181.60±0.02  | 22.40±0.02  | 813.95±0.02 | 7.29±0.03  |
| 7  | MD/SPEXF84 | 89.53±0.02 | 220.03±0.04  | 23.48±0.07  | 1.70±0.03   | 0.79±0.02  |
|    | MD/SPEXF88 | 89.94±0.07 | 218.98±0.03  | 22.60±0.02  | 1.73±0.02   | 0.81±0.02  |
| 8  | MD/SPEXF84 | 67.46±0.03 | 1198.48±0.02 | 16.20±0.02  | 1.80±0.07   | 3.53±0.02  |
|    | MD/SPEXF88 | 67.98±0.02 | 1199.60±0.03 | 16.18±0.03  | 1.73±0.01   | 3.50±0.01  |
| 9  | MD/SPEXF84 | 88.41±0.02 | 54.44±0.02   | 14.70±0.01  | 350.09±0.03 | 20.06±0.02 |
|    | MD/SPEXF88 | 90.02±0.03 | 55.02±0.02   | 14.35±0.03  | 351.11±0.02 | 19.76±0.03 |
| 10 | MD/SPEXF84 | 14.67±0.01 | 450.67±0.02  | 22.59±0.01  | 46.50±0.03  | 2.50±0.03  |
|    | MD/SPEXF88 | 14.70±0.03 | 449.20±0.03  | 22.60±0.03  | 46.48±0.04  | 2.32±0.04  |
| 11 | MD/SPEXF84 | 67.46±0.02 | 323.40±0.03  | 272.90±0.02 | 513.97±0.03 | 0.16±0.02  |
|    | MD/SPEXF88 | 67.00±0.03 | 322.73±0.05  | 271.14±0.03 | 515.04±0.05 | 0.15±0.03  |
| 12 | MD/SPEXF84 | 32.00±0.01 | 1198.74±0.02 | 19.20±0.04  | 4.87±0.03   | 5.61±0.02  |
|    | MD/SPEXF88 | 31.69±0.02 | 1199.60±0.03 | 19.15±0.02  | 4.84±0.02   | 5.04±0.02  |
| 13 | MD/SPEXF84 | 92.98±0.03 | 860.34±0.02  | 9.94±0.02   | 5.01±0.02   | 8.24±0.01  |
|    | MD/SPEXF88 | 91.73±0.02 | 862.26±0.02  | 10.20±0.03  | 4.84±0.03   | 8.04±0.03  |
| 14 | MD/SPEXF84 | 55.58±0.02 | 732.35±0.02  | 27.33±0.03  | 1.69±0.01   | 13.00±0.01 |
|    | MD/SPEXF88 | 56.00±0.03 | 730.46±0.02  | 27.34±0.02  | 1.70±0.03   | 12.95±0.02 |
| 15 | MD/SPEXF84 | 16.99±0.02 | 380.79±0.03  | 13.53±0.01  | 3.60±0.03   | 12.71±0.01 |
|    | MD/SPEXF88 | 15.93±0.07 | 381.89±0.02  | 13.81±0.01  | 3.57±0.02   | 13.03±0.03 |
| 16 | MD/SPEXF84 | 10.43±0.03 | 1130.10±0.02 | 18.65±0.03  | 2.60±0.04   | 11.15±0.01 |
|    | MD/SPEXF88 | 9.87±0.07  | 1132.14±0.08 | 18.70±0.02  | 2.67±0.03   | 11.20±0.03 |

Supplementary Material

|        |            |             |             |             |            |           |
|--------|------------|-------------|-------------|-------------|------------|-----------|
| 17     | MD/SPEXF84 | 11.32±0.02  | 101.77±0.03 | 18.12±0.02  | 3.02±0.03  | 1.97±0.02 |
|        | MD/SPEXF88 | 11.13±0.03  | 100.92±0.02 | 18.70±0.04  | 2.66±0.01  | 1.90±0.02 |
| 18     | MD/SPEXF84 | 35.55±0.01  | 184.58±0.02 | 157.00±0.02 | 5.95±0.02  | 5.20±0.01 |
|        | MD/SPEXF88 | 36.06±0.02  | 185.02±0.03 | 156.37±0.01 | 6.02±0.03  | 5.10±0.04 |
| 19     | MD/SPEXF84 | 12.32±0.04  | 803.96±0.04 | 19.30±0.04  | 3.97±0.02  | 1.47±0.03 |
|        | MD/SPEXF88 | 12.12±0.02  | 804.02±0.02 | 19.31±0.02  | 3.95±0.03  | 1.45±0.05 |
| 20     | MD/SPEXF84 | 35.55±0.02  | 51.61±0.03  | 27.31±0.02  | 21.14±0.03 | 2.40±0.02 |
|        | MD/SPEXF88 | 35.60±0.03  | 52.00±0.02  | 27.40±0.03  | 21.20±0.02 | 2.42±0.01 |
| 21     | MD/SPEXF84 | 90.66±0.02  | 860.47±0.03 | 18.73±0.03  | 4.90±0.03  | 3.72±0.02 |
|        | MD/SPEXF88 | 91.02±0.03  | 862.26±0.02 | 19.00±0.02  | 4.98±0.02  | 3.33±0.02 |
| 22     | MD/SPEXF84 | 83.06±0.01  | 109.99±0.01 | 14.00±0.03  | 3.95±0.02  | 5.02±0.04 |
|        | MD/SPEXF88 | 84.02±0.08  | 110.02±0.03 | 14.72±0.02  | 3.97±0.04  | 5.00±0.07 |
| 23     | MD/SPEXF84 | 131.30±0.02 | 113.01±0.02 | 19.40±0.01  | 4.02±0.03  | 3.20±0.02 |
|        | MD/SPEXF88 | 129.47±0.03 | 113.15±0.07 | 19.31±0.02  | 4.40±0.05  | 3.27±0.04 |
| 24     | MD/SPEXF84 | 131.28±0.03 | 299.16±0.03 | 15.00±0.02  | 3.55±0.03  | 3.40±0.03 |
|        | MD/SPEXF88 | 130.49±0.07 | 297.43±0.02 | 15.03±0.03  | 3.57±0.02  | 3.39±0.04 |
| T-TEST |            | 2.11        | 2.09        | 2.08        | 2.10       | 1.47      |

# Supplementary Material

Table S2. Determination of MLH1, MSH2, MSH6, PMS2 and KRAS in saliva samples (N=10).

| Sample No. | Sensor     | MLH1 ng mL <sup>-1</sup> | MSH2 pg mL <sup>-1</sup> | MSH6 pg mL <sup>-1</sup> | PMS2 ng mL <sup>-1</sup> | KRAS µg mL <sup>-1</sup> |
|------------|------------|--------------------------|--------------------------|--------------------------|--------------------------|--------------------------|
| 1          | MD/SPEXF84 | 46.87±0.03               | 1682.60±0.03             | 16.57±0.02               | 3.42±0.03                | 7.49±0.02                |
|            | MD/SPEXF88 | 46.89±0.02               | 1683.12±0.04             | 16.92±0.03               | 3.31±0.05                | 7.18±0.03                |
| 2          | MD/SPEXF84 | 671.47±0.03              | 349.51±0.02              | 43.47±0.03               | 3.70±0.03                | 1.42±0.04                |
|            | MD/SPEXF88 | 673.25±0.02              | 346.57±0.04              | 43.45±0.05               | 3.62±0.02                | 1.83±0.07                |
| 3          | MD/SPEXF84 | 57.64±0.02               | 1027.28±0.04             | 9.30±0.04                | 3.05±0.02                | 4.37±0.02                |
|            | MD/SPEXF88 | 57.40±0.03               | 1026.95±0.07             | 9.38±0.02                | 3.03±0.04                | 4.30±0.03                |
| 4          | MD/SPEXF84 | 46.87±0.03               | 4.36±0.04                | 24.50±0.04               | 20.31±0.03               | 14.30±0.03               |
|            | MD/SPEXF88 | 46.50±0.02               | 4.81±0.02                | 24.46±0.03               | 20.74±0.02               | 14.75±0.02               |
| 5          | MD/SPEXF84 | 78.09±0.02               | 21.47±0.03               | 17.84±0.04               | 0.98±0.05                | 37.85±0.04               |
|            | MD/SPEXF88 | 80.19±0.07               | 21.50±0.04               | 17.44±0.02               | 0.96±0.02                | 37.23±0.03               |
| 6          | MD/SPEXF84 | 78.09±0.03               | 986.11±0.03              | 17.51±0.04               | 3.63±0.01                | 11.36±0.03               |
|            | MD/SPEXF88 | 78.24±0.05               | 984.87±0.04              | 17.31±0.02               | 3.86±0.03                | 11.40±0.02               |
| 7          | MD/SPEXF84 | 46.87±0.03               | 1828.90±0.03             | 19.87±0.03               | 2.59±0.04                | 2.64±0.04                |
|            | MD/SPEXF88 | 47.02±0.07               | 1830.04±0.02             | 20.60±0.05               | 2.20±0.03                | 2.97±0.03                |
| 8          | MD/SPEXF84 | 135.03±0.02              | 623.03±0.02              | 14.27±0.03               | 1.39±0.02                | 28.18±0.03               |
|            | MD/SPEXF88 | 134.97±0.02              | 623.91±0.03              | 14.93±0.02               | 1.53±0.01                | 28.09±0.02               |
| 9          | MD/SPEXF84 | 60.48±0.03               | 4.46±0.03                | 37.88±0.04               | 5.10±0.02                | 11.36±0.04               |
|            | MD/SPEXF88 | 61.03±0.04               | 4.81±0.02                | 37.48±0.02               | 5.14±0.04                | 11.72±0.05               |
| 10         | MD/SPEXF84 | 27.53±0.03               | 2.53±0.04                | 36.70±0.03               | 1.83±0.03                | 5.96±0.03                |
|            | MD/SPEXF88 | 27.40±0.02               | 2.51±0.01                | 36.64±0.02               | 1.87±0.02                | 5.90±0.02                |

# Supplementary Material

|    |            |            |              |            |             |            |
|----|------------|------------|--------------|------------|-------------|------------|
| 11 | MD/SPEXF84 | 60.48±0.02 | 516.89±0.03  | 37.48±0.05 | 759.14±0.02 | 13.99±0.03 |
|    | MD/SPEXF88 | 61.07±0.05 | 518.10±0.05  | 37.50±0.03 | 759.36±0.01 | 14.02±0.02 |
| 12 | MD/SPEXF84 | 48.62±0.03 | 603.77±0.05  | 18.15±0.04 | 62.35±0.04  | 14.59±0.02 |
|    | MD/SPEXF88 | 48.17±0.05 | 603.46±0.02  | 18.70±0.02 | 62.69±0.03  | 14.18±0.03 |
| 13 | MD/SPEXF84 | 65.05±0.04 | 16.51±0.03   | 34.40±0.03 | 14.84±0.02  | 3.27±0.03  |
|    | MD/SPEXF88 | 65.40±0.02 | 16.40±0.02   | 34.24±0.01 | 14.50±0.03  | 3.15±0.02  |
| 14 | MD/SPEXF84 | 86.23±0.02 | 487.23±0.04  | 27.40±0.03 | 3.55±0.04   | 1.47±0.03  |
|    | MD/SPEXF88 | 86.40±0.01 | 489.50±0.03  | 27.08±0.02 | 3.52±0.01   | 1.50±0.02  |
| 15 | MD/SPEXF84 | 37.42±0.02 | 229.03±0.01  | 18.59±0.02 | 23.71±0.05  | 19.38±0.02 |
|    | MD/SPEXF88 | 37.40±0.01 | 228.57±0.03  | 18.70±0.03 | 23.68±0.03  | 19.31±0.04 |
| 16 | MD/SPEXF84 | 49.83±0.02 | 2460.12±0.05 | 35.02±0.01 | 24.16±0.02  | 25.15±0.01 |
|    | MD/SPEXF88 | 50.02±0.04 | 2458.80±0.03 | 34.29±0.02 | 24.10±0.04  | 26.02±0.04 |
| 17 | MD/SPEXF84 | 49.22±0.02 | 88.43±0.02   | 22.14±0.03 | 320.15±0.04 | 3.29±0.01  |
|    | MD/SPEXF88 | 50.03±0.02 | 88.21±0.03   | 22.21±0.02 | 324.36±0.03 | 3.80±0.05  |
| 18 | MD/SPEXF84 | 27.92±0.02 | 290.92±0.03  | 13.76±0.02 | 53.54±0.03  | 5.77±0.02  |
|    | MD/SPEXF88 | 27.80±0.03 | 291.11±0.02  | 13.74±0.03 | 53.87±0.02  | 5.70±0.03  |
| 19 | MD/SPEXF84 | 49.22±0.02 | 2507.94±0.02 | 12.97±0.02 | 8.31±0.02   | 19.39±0.03 |
|    | MD/SPEXF88 | 50.07±0.03 | 2508.30±0.03 | 13.32±0.02 | 8.48±0.02   | 18.34±0.02 |
| 20 | MD/SPEXF84 | 50.44±0.03 | 290.03±0.03  | 4.85±0.03  | 51.85±0.02  | 0.78±0.01  |
|    | MD/SPEXF88 | 49.87±0.04 | 287.82±0.04  | 5.96±0.05  | 51.65±0.03  | 0.77±0.03  |
| 21 | MD/SPEXF84 | 65.05±0.02 | 87.93±0.02   | 18.79±0.04 | 2.36±0.02   | 0.27±0.04  |
|    | MD/SPEXF88 | 65.40±0.03 | 88.21±0.04   | 18.41±0.02 | 2.66±0.03   | 0.30±0.01  |
| 22 | MD/SPEXF84 | 15.24±0.03 | 293.14±0.02  | 19.03±0.02 | 13.66±0.03  | 2.95±0.02  |

# Supplementary Material

|    |            |             |              |            |            |            |
|----|------------|-------------|--------------|------------|------------|------------|
|    | MD/SPEXF88 | 15.15±0.07  | 291.14±0.02  | 18.45±0.03 | 13.32±0.02 | 2.97±0.03  |
| 23 | MD/SPEXF84 | 52.95±0.03  | 291.12±0.03  | 27.65±0.03 | 54.35±0.02 | 26.08±0.02 |
|    | MD/SPEXF88 | 53.00±0.04  | 849.60±0.03  | 27.08±0.04 | 53.75±0.03 | 27.03±0.04 |
| 24 | MD/SPEXF84 | 3.64±0.02   | 1710.12±0.04 | 22.19±0.03 | 16.48±0.02 | 2.52±0.01  |
|    | MD/SPEXF88 | 3.63±0.01   | 1709.70±0.01 | 22.21±0.01 | 16.50±0.03 | 2.50±0.03  |
| 25 | MD/SPEXF84 | 117.60±0.02 | 101.97±0.04  | 14.12±0.03 | 6.64±0.03  | 35.16±0.03 |
|    | MD/SPEXF88 | 117.15±0.03 | 102.85±0.03  | 14.40±0.02 | 6.84±0.02  | 35.02±0.08 |
| 26 | MD/SPEXF84 | 168.69±0.03 | 100.05±0.02  | 27.00±0.02 | 55.36±0.02 | 26.44±0.03 |
|    | MD/SPEXF88 | 170.02±0.05 | 99.87±0.07   | 27.34±0.04 | 54.97±0.04 | 27.00±0.05 |
| 27 | MD/SPEXF84 | 8.46±0.02   | 61.11±0.03   | 18.50±0.02 | 37.47±0.03 | 15.87±0.04 |
|    | MD/SPEXF88 | 9.02±0.07   | 62.00±0.05   | 18.41±0.03 | 38.05±0.04 | 15.19±0.02 |
| 28 | MD/SPEXF84 | 54.91±0.03  | 1748.96±0.07 | 9.14±0.07  | 21.48±0.04 | 12.19±0.03 |
|    | MD/SPEXF88 | 55.00±0.04  | 1750.60±0.03 | 9.02±0.03  | 20.96±0.03 | 13.00±0.02 |
| 29 | MD/SPEXF84 | 35.10±0.02  | 1821.60±0.04 | 14.14±0.02 | 10.47±0.03 | 12.59±0.04 |
|    | MD/SPEXF88 | 34.97±0.06  | 1820.97±0.03 | 14.30±0.04 | 11.02±0.02 | 12.40±0.03 |
| 30 | MD/SPEXF84 | 80.04±0.03  | 1055.86±0.02 | 11.70±0.03 | 37.47±0.05 | 1.97±0.04  |
|    | MD/SPEXF88 | 79.87±0.04  | 1052.90±0.08 | 12.09±0.05 | 38.02±0.04 | 2.00±0.02  |
| 31 | MD/SPEXF84 | 78.09±0.03  | 319.22±0.03  | 18.37±0.04 | 21.47±0.03 | 11.49±0.04 |
|    | MD/SPEXF88 | 80.02±0.05  | 320.14±0.02  | 18.70±0.03 | 22.05±0.02 | 11.37±0.02 |
| 32 | MD/SPEXF84 | 80.04±0.02  | 632.17±0.02  | 12.00±0.04 | 25.94±0.03 | 10.48±0.03 |
|    | MD/SPEXF88 | 79.93±0.07  | 635.40±0.04  | 11.04±0.05 | 26.00±0.02 | 11.02±0.05 |
| 33 | MD/SPEXF84 | 51.68±0.02  | 2823.10±0.02 | 14.19±0.06 | 23.46±0.02 | 12.15±0.02 |
|    | MD/SPEXF88 | 52.00±0.01  | 2824.96±0.03 | 14.30±0.02 | 23.52±0.02 | 12.00±0.01 |

# Supplementary Material

|    |            |             |              |            |             |            |
|----|------------|-------------|--------------|------------|-------------|------------|
| 34 | MD/SPEXF84 | 78.09±0.03  | 245.03±0.02  | 12.17±0.04 | 21.47±0.03  | 15.71±0.02 |
|    | MD/SPEXF88 | 80.00±0.02  | 243.97±0.03  | 12.32±0.03 | 20.97±0.01  | 15.60±0.01 |
| 35 | MD/SPEXF84 | 19.78±0.03  | 84.45±0.03   | 5.70±0.03  | 12.97±0.02  | 12.47±0.03 |
|    | MD/SPEXF88 | 20.03±0.05  | 85.02±0.02   | 5.68±0.02  | 13.02±0.05  | 12.59±0.02 |
| 36 | MD/SPEXF84 | 224.27±0.03 | 1727.60±0.02 | 50.02±0.03 | 429.40±0.04 | 11.49±0.02 |
|    | MD/SPEXF88 | 225.04±0.05 | 1730.25±0.04 | 49.79±0.04 | 427.36±0.03 | 11.32±0.05 |
| 37 | MD/SPEXF84 | 240.79±0.03 | 2227.20±0.03 | 22.48±0.04 | 53.47±0.02  | 10.48±0.03 |
|    | MD/SPEXF88 | 238.40±0.02 | 2226.98±0.04 | 22.60±0.03 | 54.02±0.03  | 10.49±0.02 |
| 38 | MD/SPEXF84 | 161.04±0.02 | 2509.02±0.04 | 24.98±0.04 | 37.61±0.04  | 12.34±0.02 |
|    | MD/SPEXF88 | 160.95±0.03 | 2508.30±0.02 | 26.99±0.01 | 40.02±0.05  | 12.67±0.04 |
| 39 | MD/SPEXF84 | 143.12±0.04 | 327.02±0.02  | 18.68±0.04 | 53.47±0.04  | 12.11±0.04 |
|    | MD/SPEXF88 | 140.08±0.02 | 330.00±0.08  | 18.70±0.02 | 53.00±0.02  | 12.97±0.02 |
| 40 | MD/SPEXF84 | 121.48±0.02 | 13.87±0.03   | 18.32±0.03 | 27.47±0.03  | 13.74±0.03 |
|    | MD/SPEXF88 | 120.79±0.03 | 12.98±0.05   | 18.59±0.05 | 27.59±0.03  | 13.02±0.04 |
| 41 | MD/SPEXF84 | 37.46±0.02  | 868.13±0.02  | 36.00±0.02 | 24.03±0.01  | 13.02±0.04 |
|    | MD/SPEXF88 | 37.42±0.03  | 870.40±0.02  | 35.81±0.03 | 24.14±0.02  | 12.96±0.03 |
| 42 | MD/SPEXF84 | 19.15±0.02  | 632.17±0.02  | 18.56±0.04 | 1.87±0.02   | 14.02±0.07 |
|    | MD/SPEXF88 | 20.00±0.04  | 630.10±0.04  | 18.70±0.02 | 1.99±0.03   | 13.97±0.02 |
| 43 | MD/SPEXF84 | 51.06±0.03  | 1727.60±0.03 | 17.49±0.03 | 2.04±0.02   | 11.00±0.04 |
|    | MD/SPEXF88 | 51.42±0.02  | 1724.84±0.08 | 17.31±0.01 | 2.00±0.03   | 10.49±0.03 |
| 44 | MD/SPEXF84 | 54.91±0.03  | 1160.99±0.03 | 27.30±0.04 | 2.85±0.08   | 26.44±0.02 |
|    | MD/SPEXF88 | 55.00±0.02  | 1163.41±0.02 | 27.34±0.02 | 2.70±0.03   | 26.70±0.04 |

### Supplementary Material

|            |  |      |      |      |      |      |
|------------|--|------|------|------|------|------|
| T-<br>TEST |  | 2.04 | 2.12 | 2.11 | 1.47 | 1.03 |
|------------|--|------|------|------|------|------|



# Supplementary Material

Table S3. Determination of MLH1, MSH2, MSH6, PMS2 and KRAS in urine samples (N=10).

| Sample No. | Sensor     | MLH1 ng mL <sup>-1</sup> | MSH2 pg mL <sup>-1</sup> | MSH6 pg mL <sup>-1</sup> | PMS2 ng mL <sup>-1</sup> | KRAS µg mL <sup>-1</sup> |
|------------|------------|--------------------------|--------------------------|--------------------------|--------------------------|--------------------------|
| 1          | MD/SPEXF84 | 185.64±0.03              | 952.96±0.04              | 20.19±0.03±              | 132.01±0.01              | 2.96±0.02                |
|            | MD/SPEXF88 | 186.47±0.05              | 956.61±0.02              | 20.43±0.01               | 132.99±0.03              | 3.00±0.01                |
| 2          | MD/SPEXF84 | 254.94±0.04              | 1414.15±0.08             | 26.08±0.03               | 61.30±0.02               | 86.22±0.01               |
|            | MD/SPEXF88 | 255.11±0.02              | 1402.50±0.03             | 27.34±0.02               | 60.39±0.04               | 87.58±0.03               |
| 3          | MD/SPEXF84 | 78.09±0.01               | 526.03±0.02              | 17.48±0.03               | 2.00±0.02                | 28.20±0.02               |
|            | MD/SPEXF88 | 79.40±0.04               | 527.00±0.04              | 17.44±0.01               | 2.35±0.02                | 28.13±0.05               |
| 4          | MD/SPEXF84 | 35.99±0.01               | 996.75±0.01              | 44.87±0.04               | 2.10±0.05                | 2.62±0.01                |
|            | MD/SPEXF88 | 36.07±0.04               | 996.51±0.03              | 44.02±0.01               | 2.06±0.02                | 2.70±0.03                |
| 5          | MD/SPEXF84 | 36.01±0.02               | 106.99±0.03              | 27.47±0.05               | 13.72±0.02               | 17.73±0.01               |
|            | MD/SPEXF88 | 36.15±0.03               | 106.98±0.04              | 27.08±0.03               | 13.32±0.04               | 17.96±0.04               |
| 6          | MD/SPEXF84 | 78.09±0.01               | 597.32±0.01              | 18.12±0.05               | 6.56±0.03                | 8.33±0.03                |
|            | MD/SPEXF88 | 78.06±0.03               | 594.41±0.03              | 18.70±0.01               | 6.71±0.01                | 8.26±0.02                |
| 7          | MD/SPEXF84 | 78.10±0.02               | 603.29±0.05              | 32.74±0.03               | 379.32±0.02              | 11.36±0.02               |
|            | MD/SPEXF88 | 78.12±0.05               | 603.46±0.03              | 33.50±0.02               | 370.45±0.05              | 11.90±0.02               |
| 8          | MD/SPEXF84 | 46.87±0.02               | 575.99±0.02              | 17.84±0.03               | 88.79±0.01               | 17.53±0.02               |
|            | MD/SPEXF88 | 46.21±0.07               | 576.63±0.03              | 17.85±0.01               | 87.97±0.04               | 20.09±0.03               |
| 9          | MD/SPEXF84 | 60.49±0.03               | 1652.40±0.07             | 42.93±0.05               | 88.79±0.02               | 37.87±0.01               |
|            | MD/SPEXF88 | 59.73±0.07               | 1651.00±0.03             | 44.13±0.02               | 88.37±0.05               | 38.14±0.02               |
| 0.010      | MD/SPEXF84 | 35.99±0.02               | 432.80±0.04              | 22.37±0.05               | 3.62±0.06                | 14.29±0.03               |
|            | MD/SPEXF88 | 35.47±0.02               | 434.91±0.01              | 22.40±0.04               | 3.57±0.01                | 14.40±0.05               |

# Supplementary Material

|    |            |            |              |             |             |            |
|----|------------|------------|--------------|-------------|-------------|------------|
| 11 | MD/SPEXF84 | 27.53±0.01 | 616.56±0.02  | 45.09±0.04  | 1.30±0.03   | 11.12±0.04 |
|    | MD/SPEXF88 | 27.14±0.03 | 612.63±0.04  | 44.61±0.01  | 1.33±0.01   | 11.36±0.02 |
| 12 | MD/SPEXF84 | 46.87±0.01 | 99.07±0.05   | 35.39±0.08  | 43.04±0.02  | 2.62±0.01  |
|    | MD/SPEXF88 | 49.85±0.03 | 99.38±0.02   | 34.63±0.02  | 42.91±0.05  | 2.73±0.04  |
| 13 | MD/SPEXF84 | 36.48±0.01 | 840.56±0.08  | 412.84±0.03 | 2.70±0.03   | 1.09±0.02  |
|    | MD/SPEXF88 | 37.02±0.03 | 837.12±0.04  | 412.71±0.02 | 2.66±0.01   | 1.13±0.02  |
| 14 | MD/SPEXF84 | 36.48±0.02 | 870.14±0.08  | 22.84±0.03  | 13.40±0.02  | 22.01±0.04 |
|    | MD/SPEXF88 | 39.08±0.09 | 862.26±0.03  | 22.40±0.01  | 12.72±0.01  | 23.08±0.01 |
| 15 | MD/SPEXF84 | 27.43±0.03 | 749.73±0.01  | 57.48±0.08  | 627.89±0.03 | 14.30±0.02 |
|    | MD/SPEXF88 | 26.84±0.03 | 749.20±0.03  | 61.87±0.02  | 625.81±0.04 | 13.50±0.02 |
| 16 | MD/SPEXF84 | 20.11±0.02 | 1267.42±0.02 | 45.59±0.04  | 1.03±0.01   | 11.17±0.03 |
|    | MD/SPEXF88 | 19.93±0.03 | 1256.46±0.04 | 44.02±0.03  | 1.59±0.02   | 10.97±0.01 |
| 17 | MD/SPEXF84 | 15.24±0.01 | 220.36±0.03  | 370.42±0.03 | 8.31±0.02   | 0.33±0.04  |
|    | MD/SPEXF88 | 15.33±0.05 | 216.63±0.04  | 378.85±0.08 | 8.69±0.04   | 0.29±0.01  |
| 18 | MD/SPEXF84 | 42.45±0.01 | 880.62±0.02  | 22.40±0.03  | 5.20±0.02   | 12.00±0.03 |
|    | MD/SPEXF88 | 42.19±0.03 | 886.23±0.02  | 22.79±0.02  | 4.97±0.04   | 11.97±0.04 |
| 19 | MD/SPEXF84 | 37.90±0.02 | 1640.23±0.04 | 43.58±0.04  | 4.01±0.02   | 2.21±0.01  |
|    | MD/SPEXF88 | 37.43±0.04 | 1623.65±0.03 | 44.60±0.02  | 4.84±0.04   | 2.23±0.04  |
| 20 | MD/SPEXF84 | 87.31±0.01 | 57.47±0.02   | 64.16±0.03  | 1.12±0.01   | 0.74±0.02  |
|    | MD/SPEXF88 | 87.00±0.03 | 57.30±0.04   | 61.87±0.01  | 1.10±0.03   | 0.72±0.05  |
| 21 | MD/SPEXF84 | 13.02±0.01 | 772.49±0.02  | 231.42±0.02 | 2.64±0.02   | 50.49±0.04 |
|    | MD/SPEXF88 | 12.87±0.03 | 768.98±0.04  | 232.96±0.04 | 2.60±0.03   | 51.10±0.02 |
| 22 | MD/SPEXF84 | 52.95±0.02 | 1705.60±0.03 | 27.93±0.03  | 4.28±0.02   | 12.11±0.03 |

# Supplementary Material

|    |            |             |              |             |             |            |
|----|------------|-------------|--------------|-------------|-------------|------------|
|    | MD/SPEXF88 | 51.87±0.05  | 1704.97±0.02 | 27.04±0.04  | 4.31±0.05   | 12.52±0.03 |
| 23 | MD/SPEXF84 | 52.31±0.03  | 341.84±0.04  | 14.59±0.01  | 4.30±0.02   | 10.14±0.01 |
|    | MD/SPEXF88 | 51.94±0.02  | 340.92±0.02  | 14.73±0.04  | 4.31±0.07   | 10.11±0.08 |
| 24 | MD/SPEXF84 | 79.06±0.02  | 108.51±0.04  | 12.96±0.02  | 47.51±0.02  | 12.59±0.02 |
|    | MD/SPEXF88 | 78.87±0.06  | 108.32±0.03  | 12.21±0.07  | 47.32±0.03  | 12.47±0.01 |
| 25 | MD/SPEXF84 | 19.78±0.02  | 334.22±0.04  | 59.43±0.03  | 2.02±0.04   | 1.01±0.02  |
|    | MD/SPEXF88 | 20.05±0.03  | 337.06±0.02  | 59.14±0.05  | 2.01±0.03   | 1.04±0.05  |
| 26 | MD/SPEXF84 | 67.45±0.01  | 580.29±0.03  | 22.14±0.05  | 9.14±0.03   | 1.09±0.02  |
|    | MD/SPEXF88 | 67.42±0.03  | 585.46±0.02  | 22.02±0.03  | 9.03±0.07   | 1.10±0.03  |
| 27 | MD/SPEXF84 | 52.31±0.02  | 1750.60±0.03 | 37.49±0.02  | 4.64±0.02   | 2.47±0.01  |
|    | MD/SPEXF88 | 51.49±0.03  | 1749.98±0.02 | 37.40±0.05  | 4.32±0.04   | 2.40±0.02  |
| 28 | MD/SPEXF84 | 82.04±0.03  | 1114.90±0.03 | 24.32±0.02  | 45.46±0.03  | 7.69±0.03  |
|    | MD/SPEXF88 | 81.97±0.04  | 1115.00±0.02 | 24.68±0.02  | 46.00±0.04  | 7.83±0.02  |
| 29 | MD/SPEXF84 | 89.53±0.01  | 279.37±0.04  | 499.79±0.03 | 25.08±0.02  | 0.22±0.01  |
|    | MD/SPEXF88 | 90.02±0.02  | 280.17±0.03  | 499.08±0.01 | 24.97±0.04  | 0.24±0.01  |
| 30 | MD/SPEXF84 | 241.51±0.03 | 1149.92±0.03 | 43.09±0.03  | 123.84±0.03 | 7.00±0.03  |
|    | MD/SPEXF88 | 240.97±0.02 | 1145.80±0.02 | 43.45±0.02  | 124.69±0.05 | 7.15±0.02  |
| 31 | MD/SPEXF84 | 51.68±0.03  | 174.77±0.05  | 13.27±0.02  | 2.14±0.02   | 0.69±0.04  |
|    | MD/SPEXF88 | 50.97±0.02  | 172.71±0.03  | 13.33±0.04  | 2.10±0.03   | 0.72±0.02  |
| 32 | MD/SPEXF84 | 163.54±0.02 | 2453.82±0.04 | 18.15±0.03  | 2.14±0.03   | 0.70±0.01  |
|    | MD/SPEXF88 | 164.02±0.04 | 2458.80±0.03 | 18.41±0.02  | 2.67±0.05   | 0.73±0.01  |
| 33 | MD/SPEXF84 | 371.19±0.02 | 282.68±0.02  | 15.19±0.03  | 2.60±0.02   | 20.67±0.04 |
|    | MD/SPEXF88 | 369.42±0.03 | 280.47±0.08  | 15.59±0.02  | 2.67±0.03   | 20.23±0.02 |

# Supplementary Material

|    |            |             |              |            |             |            |
|----|------------|-------------|--------------|------------|-------------|------------|
| 34 | MD/SPEXF84 | 168.69±0.03 | 82.11±0.03   | 32.94±0.03 | 58.25±0.03  | 20.76±0.03 |
|    | MD/SPEXF88 | 167.43±0.04 | 80.89±0.02   | 33.83±0.02 | 57.75±0.02  | 19.93±0.02 |
| 35 | MD/SPEXF84 | 55.58±0.02  | 595.30±0.02  | 26.53±0.05 | 58.25±0.02  | 4.14±0.01  |
|    | MD/SPEXF88 | 57.20±0.03  | 594.27±0.03  | 26.54±0.02 | 58.40±0.04  | 4.74±0.03  |
| 36 | MD/SPEXF84 | 125.91±0.01 | 392.47±0.03  | 14.49±0.03 | 523.41±0.03 | 0.68±0.02  |
|    | MD/SPEXF88 | 127.19±0.08 | 400.55±0.02  | 15.37±0.02 | 520.15±0.05 | 0.71±0.02  |
| 37 | MD/SPEXF84 | 85.16±0.02  | 1176.70±0.04 | 34.97±0.02 | 34.42±0.02  | 1.95±0.05  |
|    | MD/SPEXF88 | 84.97±0.03  | 1175.93±0.02 | 35.01±0.03 | 34.20±0.04  | 1.97±0.01  |
| 38 | MD/SPEXF84 | 9.44±0.02   | 1110.33±0.02 | 26.48±0.04 | 3.77±0.02   | 0.57±0.03  |
|    | MD/SPEXF88 | 9.37±0.05   | 1111.50±0.04 | 26.57±0.02 | 3.35±0.02   | 0.58±0.02  |
| 39 | MD/SPEXF84 | 90.66±0.03  | 572.97±0.02  | 43.03±0.03 | 53.54±0.03  | 2.14±0.01  |
|    | MD/SPEXF88 | 92.77±0.02  | 576.63±0.03  | 37.02±0.01 | 54.63±0.04  | 2.20±0.04  |
| 40 | MD/SPEXF84 | 22.10±0.02  | 712.81±0.03  | 37.15±0.04 | 47.32±0.02  | 1.97±0.03  |
|    | MD/SPEXF88 | 21.97±0.03  | 713.00±0.02  | 37.02±0.02 | 48.00±0.05  | 1.90±0.03  |
| 41 | MD/SPEXF84 | 54.91±0.03  | 1821.60±0.02 | 25.62±0.03 | 37.14±0.02  | 2.34±0.02  |
|    | MD/SPEXF88 | 54.47±0.02  | 1820.47±0.03 | 25.60±0.02 | 37.22±0.04  | 2.32±0.05  |
| 42 | MD/SPEXF84 | 54.91±0.03  | 1870.50±0.02 | 20.20±0.01 | 23.44±0.03  | 4.17±0.03  |
|    | MD/SPEXF88 | 53.97±0.02  | 1871.25±0.03 | 19.15±0.03 | 22.97±0.02  | 4.69±0.02  |
| 43 | MD/SPEXF84 | 131.17±0.02 | 2991.60±0.01 | 37.42±0.03 | 24.15±0.05  | 3.29±0.02  |
|    | MD/SPEXF88 | 130.97±0.05 | 2990.47±0.03 | 37.07±0.01 | 24.39±0.07  | 3.47±0.01  |
| 44 | MD/SPEXF84 | 127.66±0.03 | 1773.90±0.02 | 25.42±0.03 | 15.49±0.02  | 4.95±0.03  |
|    | MD/SPEXF88 | 126.93±0.04 | 1772.45±0.03 | 25.36±0.02 | 15.35±0.04  | 4.70±0.03  |
| 45 | MD/SPEXF84 | 82.04±0.02  | 1773.90±0.03 | 25.40±0.02 | 13.49±0.01  | 5.32±0.02  |

# Supplementary Material

|        |            |             |              |            |             |            |
|--------|------------|-------------|--------------|------------|-------------|------------|
|        | MD/SPEXF88 | 81.96±0.03  | 1172.45±0.03 | 25.35±0.01 | 13.40±0.02  | 5.35±0.03  |
| 46     | MD/SPEXF84 | 160.00±0.03 | 181.25±0.04  | 30.47±0.03 | 111.37±0.04 | 2.89±0.02  |
|        | MD/SPEXF88 | 159.02±0.02 | 181.60±0.03  | 30.25±0.03 | 112.79±0.03 | 2.97±0.02  |
| 47     | MD/SPEXF84 | 52.95±0.02  | 286.13±0.04  | 25.72±0.02 | 13.13±0.02  | 1.94±0.03  |
|        | MD/SPEXF88 | 53.00±0.03  | 287.09±0.02  | 25.36±0.03 | 13.29±0.02  | 1.923±0.02 |
| T-TEST |            | 1.98        | 2.03         | 2.05       | 2.12        | 1.34       |

# Supplementary Material

Table S4. Determination of MLH1, MSH2, MSH6, PMS2 and KRAS in whole blood samples (N=10).

| Sample No. | Sensor     | MLH1 ng mL <sup>-1</sup> | MSH2 pg mL <sup>-1</sup> | MSH6 pg mL <sup>-1</sup> | PMS2 ng mL <sup>-1</sup> | KRAS µg mL <sup>-1</sup> |
|------------|------------|--------------------------|--------------------------|--------------------------|--------------------------|--------------------------|
| 1          | MD/SPEXF84 | 60.49±0.03               | 942.02±0.03              | 34.98±0.02               | 7.29±0.03                | 17.73±0.04               |
|            | MD/SPEXF88 | 61.05±0.05               | 942.48±0.02              | 36.64±0.05               | 7.62±0.05                | 17.96±0.03               |
| 2          | MD/SPEXF84 | 47.34±0.04               | 386.49±0.02              | 17.12±0.02               | 13.39±0.04               | 11.36±0.06               |
|            | MD/SPEXF88 | 48.00±0.02               | 385.65±0.05              | 17.31±0.03               | 12.99±0.03               | 11.79±0.04               |
| 3          | MD/SPEXF84 | 78.08±0.03               | 738.56±0.04              | 19.48±0.06               | 13.30±0.04               | 28.92±0.04               |
|            | MD/SPEXF88 | 78.35±0.03               | 722.89±0.03              | 20.26±0.04               | 12.98±0.03               | 28.06±0.03               |
| 4          | MD/SPEXF84 | 60.48±0.04               | 295.75±0.05              | 19.78±0.06               | 13.39±0.02               | 2.61±0.03                |
|            | MD/SPEXF88 | 61.74±0.08               | 296.68±0.03              | 20.43±0.03               | 13.64±0.04               | 2.71±0.04                |
| 5          | MD/SPEXF84 | 131.27±0.03              | 690.44±0.06              | 17.94±0.05               | 1.79±0.05                | 14.13±0.02               |
|            | MD/SPEXF88 | 130.95±0.02              | 690.53±0.03              | 17.31±0.03               | 1.20±0.03                | 14.98±0.05               |
| 6          | MD/SPEXF84 | 60.48±0.03               | 523.51±0.03              | 37.29±0.02               | 2.30±0.02                | 7.35±0.04                |
|            | MD/SPEXF88 | 60.15±0.04               | 524.00±0.05              | 37.06±0.04               | 2.35±0.04                | 7.33±0.02                |
| 7          | MD/SPEXF84 | 135.03±0.02              | 50.41±0.04               | 24.16±0.04               | 7.23±0.03                | 22.28±0.02               |
|            | MD/SPEXF88 | 133.98±0.08              | 50.19±0.03               | 24.46±0.03               | 7.05±0.08                | 21.97±0.04               |
| 8          | MD/SPEXF84 | 47.45±0.05               | 501.71±0.04              | 20.47±0.03               | 3.97±0.05                | 1.12±0.02                |
|            | MD/SPEXF88 | 47.80±0.03               | 501.95±0.03              | 20.43±0.04               | 3.91±0.01                | 1.65±0.04                |
| 9          | MD/SPEXF84 | 4.26±0.03                | 1703.30±0.04             | 2.78±0.04                | 13.39±0.02               | 9.14±0.02                |
|            | MD/SPEXF88 | 4.20±0.01                | 1702.98±0.07             | 2.69±0.02                | 13.68±0.07               | 9.79±0.03                |
| 10         | MD/SPEXF84 | 36.48±0.04               | 11.31±0.05               | 20.85±0.02               | 2.37±0.04                | 9.14±0.02                |
|            | MD/SPEXF88 | 36.13±0.04               | 10.90±0.02               | 20.77±0.04               | 2.35±0.02                | 9.33±0.05                |

# Supplementary Material

|    |            |             |              |             |             |            |
|----|------------|-------------|--------------|-------------|-------------|------------|
| 11 | MD/SPEXF84 | 78.00±0.03  | 158.40±0.08  | 20.46±0.03  | 30.04±0.02  | 17.20±0.04 |
|    | MD/SPEXF88 | 78.00±0.05  | 155.41±0.03  | 20.43±0.05  | 29.86±0.06  | 17.53±0.02 |
| 12 | MD/SPEXF84 | 101.70±0.04 | 362.27±0.08  | 30.60±0.05  | 87.17±0.04  | 13.89±0.04 |
|    | MD/SPEXF88 | 100.98±0.07 | 368.01±0.03  | 29.86±0.04  | 89.18±0.02  | 13.92±0.02 |
| 13 | MD/SPEXF84 | 36.48±0.03  | 75.02±0.08   | 87.09±0.02  | 3.87±0.04   | 11.31±0.04 |
|    | MD/SPEXF88 | 36.15±0.04  | 73.74±0.02   | 86.30±0.07  | 3.91±0.03   | 11.45±0.03 |
| 14 | MD/SPEXF84 | 27.43±0.03  | 200.53±0.03  | 654.87±0.07 | 585.20±0.07 | 14.30±0.04 |
|    | MD/SPEXF88 | 27.21±0.05  | 200.41±0.07  | 651.93±0.08 | 587.35±0.04 | 14.27±0.02 |
| 15 | MD/SPEXF84 | 101.70±0.02 | 2227.20±0.04 | 14.75±0.04  | 20.31±0.04  | 17.53±0.04 |
|    | MD/SPEXF88 | 101.37±0.05 | 2225.97±0.03 | 14.93±0.02  | 20.49±0.02  | 18.00±0.03 |
| 16 | MD/SPEXF84 | 101.69±0.04 | 200.53±0.04  | 29.65±0.05  | 43.04±0.05  | 22.01±0.03 |
|    | MD/SPEXF88 | 102.05±0.07 | 198.47±0.08  | 29.86±0.03  | 42.64±0.08  | 21.98±0.05 |
| 17 | MD/SPEXF84 | 101.69±0.04 | 172.76±0.05  | 25.52±0.07  | 43.04±0.02  | 37.85±0.05 |
|    | MD/SPEXF88 | 100.47±0.08 | 174.81±0.02  | 24.46±0.03  | 44.57±0.04  | 36.96±0.07 |
| 18 | MD/SPEXF84 | 23.15±0.02  | 985.54±0.02  | 947.88±0.03 | 324.36±0.02 | 39.05±0.03 |
|    | MD/SPEXF88 | 24.04±0.08  | 983.98±0.04  | 945.05±0.05 | 325.00±0.07 | 39.94±0.08 |
| 19 | MD/SPEXF84 | 78.09±0.03  | 973.02±0.05  | 24.57±0.08  | 30.04±0.02  | 9.14±0.02  |
|    | MD/SPEXF88 | 78.84±0.07  | 970.97±0.07  | 24.46±0.03  | 31.45±0.05  | 9.74±0.04  |
| 20 | MD/SPEXF84 | 61.23±0.03  | 150.97±0.04  | 24.66±0.04  | 30.58±0.04  | 17.53±0.07 |
|    | MD/SPEXF88 | 60.95±0.07  | 151.18±0.02  | 24.46±0.08  | 30.69±0.02  | 17.48±0.02 |
| 21 | MD/SPEXF84 | 27.53±0.03  | 985.54±0.7   | 95.75±0.02  | 11.03±0.02  | 22.42±0.04 |
|    | MD/SPEXF88 | 27.49±0.05  | 987.03±0.05  | 95.30±0.04  | 10.95±0.07  | 22.59±0.07 |
| 22 | MD/SPEXF84 | 60.49±0.03  | 200.53±0.07  | 35.47±0.07  | 2.20±0.02   | 56.13±0.02 |

# Supplementary Material

|    |            |             |             |            |            |            |
|----|------------|-------------|-------------|------------|------------|------------|
|    | MD/SPEXF88 | 58.75±0.07  | 200.32±0.05 | 36.64±0.02 | 2.35±0.03  | 56.51±0.02 |
| 23 | MD/SPEXF84 | 78.09±0.05  | 152.09±0.02 | 15.75±0.03 | 20.31±0.05 | 22.33±0.04 |
|    | MD/SPEXF88 | 78.40±0.03  | 151.84±0.04 | 15.51±0.03 | 23.50±0.04 | 22.33±0.04 |
| 24 | MD/SPEXF84 | 100.39±0.02 | 503.04±0.07 | 4.51±0.01  | 43.04±0.02 | 22.28±0.04 |
|    | MD/SPEXF88 | 98.99±0.07  | 501.95±0.03 | 4.40±0.03  | 42.29±0.03 | 22.54±0.06 |
| 25 | MD/SPEXF84 | 50.26±0.03  | 102.97±0.05 | 11.92±0.08 | 1.09±0.04  | 0.13±0.04  |
|    | MD/SPEXF88 | 50.49±0.03  | 103.17±0.02 | 13.81±0.02 | 1.07±0.02  | 0.12±0.01  |
| 26 | MD/SPEXF84 | 119.02±0.04 | 26.98±0.04  | 10.98±0.02 | 13.01±0.03 | 0.83±0.05  |
|    | MD/SPEXF88 | 119.27±0.03 | 26.55±0.03  | 10.43±0.04 | 12.09±0.05 | 0.78±0.02  |
| 27 | MD/SPEXF84 | 104.04±0.08 | 29.48±0.02  | 59.46±0.06 | 3.66±0.04  | 2.97±0.04  |
|    | MD/SPEXF88 | 103.98±0.03 | 29.15±0.03  | 59.12±0.08 | 3.62±0.05  | 2.90±0.07  |
| 28 | MD/SPEXF84 | 52.31±0.02  | 2.48±0.03   | 43.40±0.07 | 4.90±0.08  | 3.29±0.04  |
|    | MD/SPEXF88 | 52.40±0.03  | 2.56±0.02   | 44.60±0.03 | 4.84±0.03  | 3.33±0.02  |
| 29 | MD/SPEXF84 | 47.34±0.03  | 23.47±0.04  | 27.00±0.04 | 13.05±0.04 | 4.92±0.03  |
|    | MD/SPEXF88 | 47.50±0.03  | 23.50±0.07  | 26.07±0.02 | 13.43±0.07 | 4.74±0.02  |
| 30 | MD/SPEXF84 | 157.70±0.03 | 99.68±0.02  | 26.00±0.07 | 57.03±0.05 | 1.23±0.04  |
|    | MD/SPEXF88 | 159.70±0.02 | 100.03±0.05 | 25.60±0.03 | 57.21±0.03 | 1.15±0.03  |
| 31 | MD/SPEXF84 | 29.46±0.03  | 51.17±0.03  | 4.47±0.05  | 10.15±0.03 | 21.47±0.03 |
|    | MD/SPEXF88 | 30.00±0.02  | 51.24±0.04  | 4.32±0.02  | 10.23±0.04 | 21.53±0.04 |
| 32 | MD/SPEXF84 | 766.03±0.07 | 10.36±0.05  | 2.15±0.04  | 4.56±0.02  | 1.97±0.02  |
|    | MD/SPEXF88 | 764.97±0.07 | 10.42±0.03  | 2.12±0.03  | 4.73±0.07  | 1.95±0.04  |
| 33 | MD/SPEXF84 | 82.04±0.03  | 131.39±0.06 | 2.60±0.07  | 13.29±0.04 | 2.95±0.05  |
|    | MD/SPEXF88 | 81.97±0.07  | 130.40±0.07 | 2.58±0.04  | 13.40±0.06 | 2.97±0.07  |



# Supplementary Material

|    |            |             |              |            |             |            |
|----|------------|-------------|--------------|------------|-------------|------------|
| 34 | MD/SPEXF84 | 228.39±0.04 | 41.95±0.02   | 90.78±0.02 | 12.47±0.07  | 11.43±0.03 |
|    | MD/SPEXF88 | 229.98±0.02 | 41.43±0.05   | 91.40±0.05 | 12.52±0.05  | 11.15±0.02 |
| 35 | MD/SPEXF84 | 11.70±0.03  | 705.60±0.03  | 11.93±0.02 | 13.13±0.04  | 10.49±0.02 |
|    | MD/SPEXF88 | 11.29±0.05  | 705.48±0.04  | 11.48±0.03 | 13.29±0.02  | 10.15±0.02 |
| 36 | MD/SPEXF84 | 21.00±0.02  | 18.22±0.03   | 20.00±0.04 | 12.49±0.03  | 9.47±0.03  |
|    | MD/SPEXF88 | 20.99±0.01  | 18.29±0.02   | 19.15±0.03 | 12.73±0.05  | 9.52±0.01  |
| 37 | MD/SPEXF84 | 131.27±0.03 | 29.92±0.04   | 37.42±0.05 | 460.02±0.03 | 8.76±00.4  |
|    | MD/SPEXF88 | 130.98±0.04 | 29.40±0.02   | 36.95±0.03 | 459.93±0.05 | 8.92±0.03  |
| 38 | MD/SPEXF84 | 85.16±0.03  | 2991.60±0.04 | 38.47±0.02 | 641.61±0.01 | 9.47±0.03  |
|    | MD/SPEXF88 | 86.37±0.02  | 2990.97±0.02 | 39.00±0.03 | 641.70±0.02 | 9.50±0.02  |
| 39 | MD/SPEXF84 | 113.47±0.07 | 850.02±0.02  | 22.80±0.05 | 2.20±0.03   | 10.15±0.05 |
|    | MD/SPEXF88 | 112.98±0.05 | 849.60±0.03  | 22.79±0.04 | 2.15±0.04   | 10.27±0.03 |
| 40 | MD/SPEXF84 | 35.55±0.03  | 380.79±0.02  | 14.15±0.07 | 10.14±0.02  | 11.59±0.03 |
|    | MD/SPEXF88 | 35.40±0.02  | 379.80±0.04  | 14.72±0.03 | 10.13±0.06  | 11.47±0.05 |
| 41 | MD/SPEXF84 | 41.93±0.02  | 106.50±0.03  | 22.51±0.03 | 2.17±0.04   | 8.15±0.03  |
|    | MD/SPEXF88 | 41.20±0.04  | 106.98±0.02  | 22.79±0.02 | 2.15±0.02   | 8.23±0.07  |
| 42 | MD/SPEXF84 | 54.91±0.03  | 1145.00±0.03 | 25.40±0.03 | 4.95±0.04   | 10.59±0.03 |
|    | MD/SPEXF88 | 54.48±0.02  | 1144.78±0.02 | 25.36±0.04 | 4.87±0.07   | 10.47±0.05 |
| 43 | MD/SPEXF84 | 82.04±0.02  | 1137.00±0.04 | 29.47±0.03 | 3.05±0.03   | 11.47±0.04 |
|    | MD/SPEXF88 | 82.47±0.04  | 1138.12±0.07 | 30.15±0.02 | 3.03±0.01   | 11.52±0.02 |
| 44 | MD/SPEXF84 | 54.91±0.03  | 934.07±0.04  | 14.15±0.02 | 12.19±0.04  | 11.49±0.04 |
|    | MD/SPEXF88 | 54.23±0.04  | 936.21±0.05  | 14.71±0.03 | 13.02±0.02  | 10.97±0.03 |
| 45 | MD/SPEXF84 | 53.60±0.02  | 199.95±0.02  | 10.47±0.03 | 1.40±0.04   | 1.92±0.03  |

Supplementary Material

|        |            |             |             |            |             |            |
|--------|------------|-------------|-------------|------------|-------------|------------|
|        | MD/SPEXF88 | 52.97±0.03  | 199.86±0.03 | 10.33±0.02 | 1.36±0.02   | 1.94±0.03  |
| 46     | MD/SPEXF84 | 30.32±0.02  | 33.03±0.03  | 10.37±0.04 | 492.92±0.05 | 0.80±0.02  |
|        | MD/SPEXF88 | 29.44±0.03  | 32.71±0.04  | 10.33±0.02 | 493.70±0.03 | 0.79±0.01  |
| 47     | MD/SPEXF84 | 52.95±0.03  | 863.00±0.02 | 22.85±0.03 | 2.12±0.02   | 1.14±0.03  |
|        | MD/SPEXF88 | 53.60±0.02  | 862.26±0.03 | 22.79±0.02 | 2.15±0.03   | 1.17±0.02  |
| 48     | MD/SPEXF84 | 119.02±0.01 | 424.15±0.05 | 78.02±0.05 | 840.19±0.08 | 7.89±0.02  |
|        | MD/SPEXF88 | 120.14±0.02 | 422.23±0.04 | 77.96±0.04 | 842.31±0.03 | 7.95±0.01  |
| 49     | MD/SPEXF84 | 123.46±0.03 | 33.92±0.04  | 25.47±0.03 | 21.75±0.04  | 8.02±0.03  |
|        | MD/SPEXF88 | 122.59±0.02 | 34.00±0.03  | 25.60±0.02 | 21.50±0.03  | 8.00±0.02  |
| 50     | MD/SPEXF84 | 52.92±0.02  | 10.85±0.03  | 14.15±0.03 | 11.93±0.02  | 10.14±0.04 |
|        | MD/SPEXF88 | 52.14±0.03  | 10.14±0.02  | 14.72±0.02 | 12.07±0.03  | 10.12±0.03 |
| T-TEST |            | 2.19        | 2.18        | 2.23       | 2.47        | 1.98       |
